# Supplementary material for: The Impact of Aboveground Epichloë Endophytic Fungi on the Rhizosphere Microbial Functions of the Host Melica transsilvanica
Source: MDPI journal article supplement (doi:10.3390/microorganisms12050956), 2024-05-08
Supplement: s1 [file s1]

**Table S1.** Data output quality

| Sample ID | Insert Size(bp) | SeqStrategy | RawReads(#) | Raw Base(GB) | %GC | Raw Q20(%) | Raw Q30(%) | Clean Reads(#) | Cleaned(%) | Clean Q20(%) | Clean Q30(%) |
|-----------|-----------------|-------------|-------------|--------------|-----|------------|------------|----------------|------------|--------------|--------------|
| EF01      | 350             | (150:150)   | 26795755    | 8.04         | 64  | 98.86      | 96.67      | 25743882       | 96.07      | 99.61        | 98.37        |
| EF02      | 350             | (150:150)   | 29191620    | 8.76         | 64  | 98.83      | 96.56      | 28028786       | 96.02      | 99.59        | 98.29        |
| EF03      | 350             | (150:150)   | 29670609    | 8.90         | 64  | 98.95      | 96.92      | 28667070       | 96.62      | 99.62        | 98.43        |
| EI01      | 350             | (150:150)   | 20625771    | 6.19         | 63  | 98.86      | 96.71      | 19860204       | 96.29      | 99.61        | 98.38        |
| EI02      | 350             | (150:150)   | 23635495    | 7.09         | 64  | 98.81      | 96.52      | 22571714       | 95.50      | 99.60        | 98.32        |
| EI03      | 350             | (150:150)   | 25990888    | 7.80         | 63  | 98.86      | 96.69      | 24987748       | 96.14      | 99.61        | 98.38        |

**Table S2.** Key genes corresponding to pathways associated with the nitrogen cycle

| Pathway                                                                  | Genes                                            |
|--------------------------------------------------------------------------|--------------------------------------------------|
| Dissimilatory nitrate reduction, nitrate -> nitrite (narGHI or napAB)    | K00370,K00371,K00374,K02567,K02568               |
| Dissimilatory nitrate reduction, nitrite -> ammonia (nirBD or nrfAH)     | K00362,K00363,K03385,K15876                      |
| Assimilatory nitrate reduction, nitrate -> nitrite (narB or NR or nasAB) | K00367,K10534,K00372,K00360                      |
| Assimilatory nitrate reduction, nitrite -> ammonia (NIT-6 or nirA)       | K17877,K00366                                    |
| Denitrification, nitrite -> nitric oxide (nirK or nirS)                  | K00368,K15864                                    |
| Denitrification, nitric oxide -> nitrous oxide (norBC)                   | K04561,K02305                                    |
| Denitrification, nitrous oxide -> nitrogen (nosZ)                        | K00376                                           |
| Nitrogen fixation, nitrogen -> ammonia (nifKDH)                          | K02586,K02588,K02591,K22896,K22897,K22898,K22899 |
| Nitrification, ammonia -> hydroxylamine (amoABC)                         | K10944,K10945,K10946                             |
| Nitrification, hydroxylamine -> nitrite (hao)                            | K10535                                           |
| Nitrification, nitrite -> nitrate (nxrAB)                                | K00370,K00371                                    |

**Table S3.** Key genes corresponding to pathways related to phosphorus metabolism

| Pathway                                     | Genes                                                                                                                                                                                                                                                                                   |
|---------------------------------------------|-----------------------------------------------------------------------------------------------------------------------------------------------------------------------------------------------------------------------------------------------------------------------------------------|
| F-type ATPase                               | K02111,K02112,K02115,K02113,K02114,K02108,K02109,K02110                                                                                                                                                                                                                                 |
| V/A-type ATPase                             | K02117,K02118,K02119,K02120,K02121,K02122,K02107,K02123,K02124                                                                                                                                                                                                                          |
| NADH-quinone oxidoreductase                 | K00330,K00331,K00332,K00333,K00331,K13378,K13380,K00334,K00335,K00336,K00337,K00338,K00339,K00340,K00341,K00342,K15863,K00343                                                                                                                                                           |
| NAD(P)H-quinone oxidoreductase              | K05574,K05582,K05581,K05579,K05572,K05580,K05578,K05576,K05577,K05575,K05573                                                                                                                                                                                                            |
| Cytochrome c oxidase, cbb3-type             | K00404,K00405,K15862,K00406,K00407                                                                                                                                                                                                                                                      |
| Cytochrome bd ubiquinol oxidase             | K00425,K00426,K00424,K22501                                                                                                                                                                                                                                                             |
| Cytochrome o ubiquinol oxidase              | K02300,K02299,K02298,K02297                                                                                                                                                                                                                                                             |
| Cytochrome c oxidase, prokaryotes, aa3-type | K02275,K02274,K02276,K15408                                                                                                                                                                                                                                                             |
| Cytochrome bc1 complex                      | K00412,K00413,K00410,K00411,K00414,K00415,K00416,K00417,K00418,K00419,K00420                                                                                                                                                                                                            |
| Type I Secretion                            | K12340,K11003,K11004                                                                                                                                                                                                                                                                    |
| Type III Secretion                          | K03221,K04056,K04057,K04058,K04059,K03219,K03222,K03223,K03224,K03225,K03226,K03227,K03228,K03229,K03230                                                                                                                                                                                |
| Type II Secretion                           | K02452,K02453,K02454,K02455,K02456,K02457,K02458,K02459,K02460,K02461,K02462,K02464,K02465                                                                                                                                                                                              |
| Type IV Secretion                           | K03194,K03197,K03198,K03200,K03202,K03204,K03201,K03203,K03195,K03199,K03196,K03205                                                                                                                                                                                                     |
| Type VI Secretion                           | K11904,K11903,K11906,K11891,K11892,K11907,K11912,K11913,K11915                                                                                                                                                                                                                          |
| Sec-SRP                                     | K03072,K03074,K12257,K03073,K03075,K03076,K03210,K03217,K03070,K13301,K03110,K03071,K03106                                                                                                                                                                                              |
| Twin arginine targeting                     | K03116,K03117,K03118,K03425                                                                                                                                                                                                                                                             |
| Bacterial chemotaxis                        | K03406,K05874,K05875,K05876,K05877,K03776,K10108,K10439,K10540,K12368,K03407,K03408,K03413,K03410,K03414,K03409,K03412,K13924,K03415,K03411,K00575,K02410,K02416,K02417,K02556,K02557                                                                                                   |
| Flagellum assembly                          | K02402,K02403,K02398,K02405,K02406,K02407,K02397,K02396,K02414,K02389,K02390,K02391,K02392,K02393,K02394,K02387,K02388,K02408,K02409,K02410,K02416,K02417,K02400,K02401,K02411,K02412,K02418,K02419,K02420,K02421,K13820,K02556,K02557,K21217,K21218,K02399,K02413,K02422,K02423,K02386 |
| Dissimilatory arsenic reduction             | K00537,K03741,K18701,K03325,K03893,K03892,K01551                                                                                                                                                                                                                                        |
